# Supplementary material for: Piloting of the virtual telecare technology ‘Addison Care’ to promote self-management in persons with chronic diseases in a community setting: protocol for a mixed-methods user experience, user engagement and usability pilot study
Source: PubMed Central journal article supplement — BMJ Open. 2022 Sep 19;12(9):e062159. doi: 10.1136/bmjopen-2022-062159 (PMC9486344; doi:10.1136/bmjopen-2022-062159), 2022-09-19
Supplement: bmjopen-2022-062159supp003.pdf [file bmjopen-2022-062159supp003.pdf]

Ethikkommission der DGP • Stockumer Straße 12 • 58453 Witten

Paracelsus Medizinische Privatuniversität  
Herrn Univ.-Prof. Dr. Dr. h.c. Jürgen Osterbrink  
Vorstand des Instituts für Pflegewissenschaft und -praxis  
Strubergasse 21  
A - 5020 Salzburg

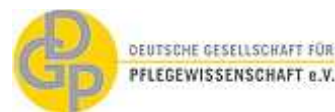

Deutsche Gesellschaft für Pflegewissenschaft  
(DGP) e. V.  
Geschäftsstelle  
Bürgerstr. 47  
47057 Duisburg

Telefon: 0203 – 356793  
info@dg-pflegewissenschaft.de

Ethikkommission der Deutschen Gesellschaft  
für Pflegewissenschaft  
(DGP) e.V.  
Vorsitz Prof. Dr. Sabine Bartholomeyczik  
Stockumer Str. 12  
58453 Witten

[Ethikkommission@dg-pflegewissenschaft.de](mailto:Ethikkommission@dg-pflegewissenschaft.de)

**Your proposal no. 21-037 to the ethical review committee of the German Society of Nursing Science (EK-DGP)**

Dear Mr. Osterbrink,

the EK-DGP discussed and evaluated your proposal

*A pilot study of Addison Care, the Virtual Telecare Technology, - PiloTT-A (application no. 21-037)*

submitted 2021-11-16.

The committee decided to give you an ethical approval.

Good luck for the project!

2021-12-27

Prof. Dr. Sabine Bartholomeyczik  
Chairperson EK-DGP
